# Supplementary material
Source: publisher figshare collection journal article supplement (https://sage.figshare.com/ndownloader/files/14427557)
Supplement: Supplementary file 1 [file 14427557]

## Supplementary Materials

Table S1. Comparison of baseline assessments of time-use settings of 24 hour recall and typical weekday among participants according to primary or secondary education using the mweso game among 568 adult participants.

| Setting             | Primary Education<br>(N = 201) | Secondary Education<br>(N = 349) |
|---------------------|--------------------------------|----------------------------------|
| Home                | 0.651                          | 0.589                            |
| Relative's Home     | -0.011                         | 0.103                            |
| Friend's Home       | 0.358                          | 0.403                            |
| Neighbor's Home     | 0.253                          | 0.22                             |
| Work                | 0.454                          | 0.62                             |
| School              | NA                             | 0.286                            |
| Market              | 0.564                          | 0.392                            |
| Place of Worship    | 0.226                          | 0.272                            |
| Salon               | 0?                             | 0.332                            |
| Gym                 | 0.856                          | 0.332                            |
| Club                | NA                             | 0.655                            |
| Bar                 | 0.262                          | 0.474                            |
| Kiosk               | 0.769                          | 0.732                            |
| Health Center       | NA                             | -0.006                           |
| Women's Group       | NA                             | NA                               |
| Taxi/transportation | 0.545                          | 0.518                            |
| Other               | 0.15                           | 0.22                             |

In a similar analysis that compared weekday to weekend day, participants spent more time at home, visiting relatives or friends, in worship and leisure-time activities, such as going to a bar or club during the weekend (Table S2). Again, the strongest evidence for correlation between measures and internal consistency was with time at home or work.

Table 6. Comparison of baseline assessments of time-use during typical weekday and weekend using the mweso game among 568 adult participants.

| Setting          | Mean<br>Typical<br>Weekday | Mean<br>Typical<br>Weekend | Mean of<br>Difference | 95%<br>Confidence<br>Interval | $\rho$ | Cronbach's<br>Alpha |
|------------------|----------------------------|----------------------------|-----------------------|-------------------------------|--------|---------------------|
| Home             | 12.7                       | 14.9                       | - 2.20                | - 2.68, - 1.73                | 0.54   | 0.70                |
| Relative's Home  | 0.05                       | 0.21                       | - 0.16                | - 0.24, - 0.08                | - 0.01 | 0.02                |
| Friend's Home    | 0.24                       | 0.46                       | - 0.23                | - 0.34, - 0.12                | 0.38   | .*                  |
| Neighbor's Home  | 0.05                       | 0.02                       | 0.03                  | 0, 0.05                       | 0.40   | 0.57                |
| Work             | 9.87                       | 5.68                       | 4.12                  | 3.68, 4.70                    | 0.57   | 0.72                |
| School           | 0.08                       | 0.02                       | 0.06                  | 0.02, 0.11                    | 0.64   | 0.78                |
| Market           | 0.10                       | 0.08                       | 0.02                  | - 0.02, 0.06                  | 0.31   | 0.47                |
| Place of Worship | 0.24                       | 1.71                       | - 1.48                | - 1.68, - 1.23                | 0.24   | 0.38                |
| Salon            | 0.03                       | 0.01                       | 0.01                  | - 0.01, 0.04                  | - 0.01 | 0.02                |
| Gym              | 0.08                       | 0.08                       | 0                     | - 0.52, 0.52                  | 0.52   | 0.68                |
| Club             | 0.02                       | 0.16                       | - 0.14                | - 0.21, - 0.07                | 0.27   | 0.42                |
| Bar              | 0.02                       | 0.10                       | - 0.08                | - 0.13, - 0.03                | 0.42   | 0.59                |
| Kiosk            | 0.07                       | 0.06                       | 0                     | - 0.03, 0.04                  | 0.43   | 0.61                |
| Health Center    | 0.01                       | 0                          | - 0.01                | - 0.01, 0.02                  | -      | -                   |

|                     |      |      |        |                |      |      |
|---------------------|------|------|--------|----------------|------|------|
| Women's Group       | 0.01 | 0.01 | 0      | - 0.09, 0.08   | 0    | -    |
| Taxi/transportation | 0.13 | 0.15 | - 0.02 | - 0.09, 0.05   | 0.20 | 0.61 |
| Other               | 0.15 | 0.22 | - 0.07 | - 0.12, - 0.01 | 0.46 | 0.51 |

\* unable to calculate Cronbach's alpha due to insufficient
